# Supplementary material for: Experience of Health Care Professionals Using Digital Tools in the Hospital: Qualitative Systematic Review
Source: PubMed Central journal article supplement (PMC10618886; doi:10.2196/50357), 2023-10-17
Supplement: humanfactors_v10i1e50357_app5.pdf [file humanfactors_v10i1e50357_app5.pdf]

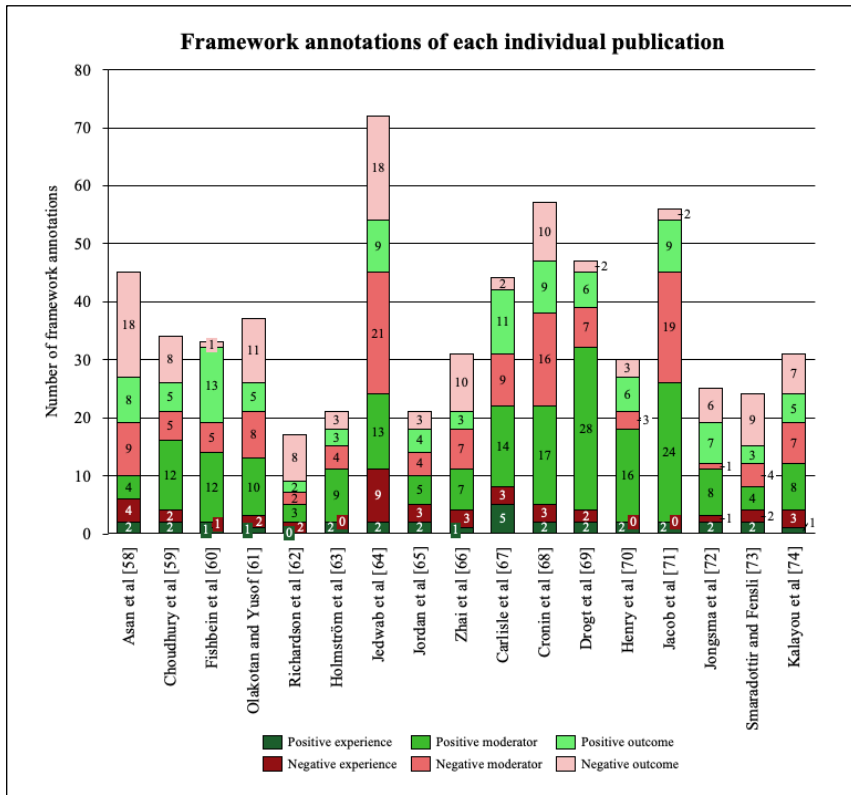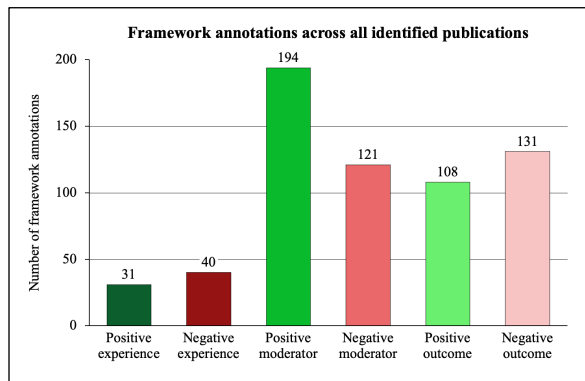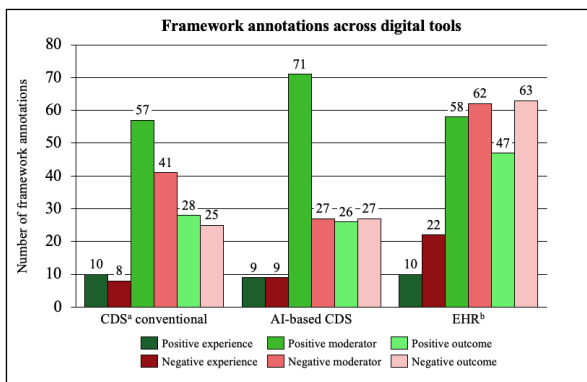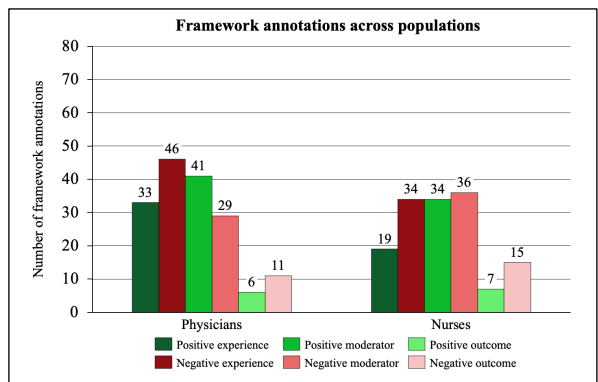

<sup>a</sup>CDS: clinical decision support.

<sup>b</sup>EHR: electronic health record.
